# Supplementary material for: Screening, identification and validation of CCND1 and PECAM1/CD31 for predicting prognosis in renal cell carcinoma patients
Source: Aging (Albany NY). 2019 Dec 18;11(24):12057–79. doi: 10.18632/aging.102540 (PMC6949065; doi:10.18632/aging.102540)
Supplement: Supplementary Figures [file aging-11-102540-s002..pdf]

SUPPLEMENTARY FIGURES

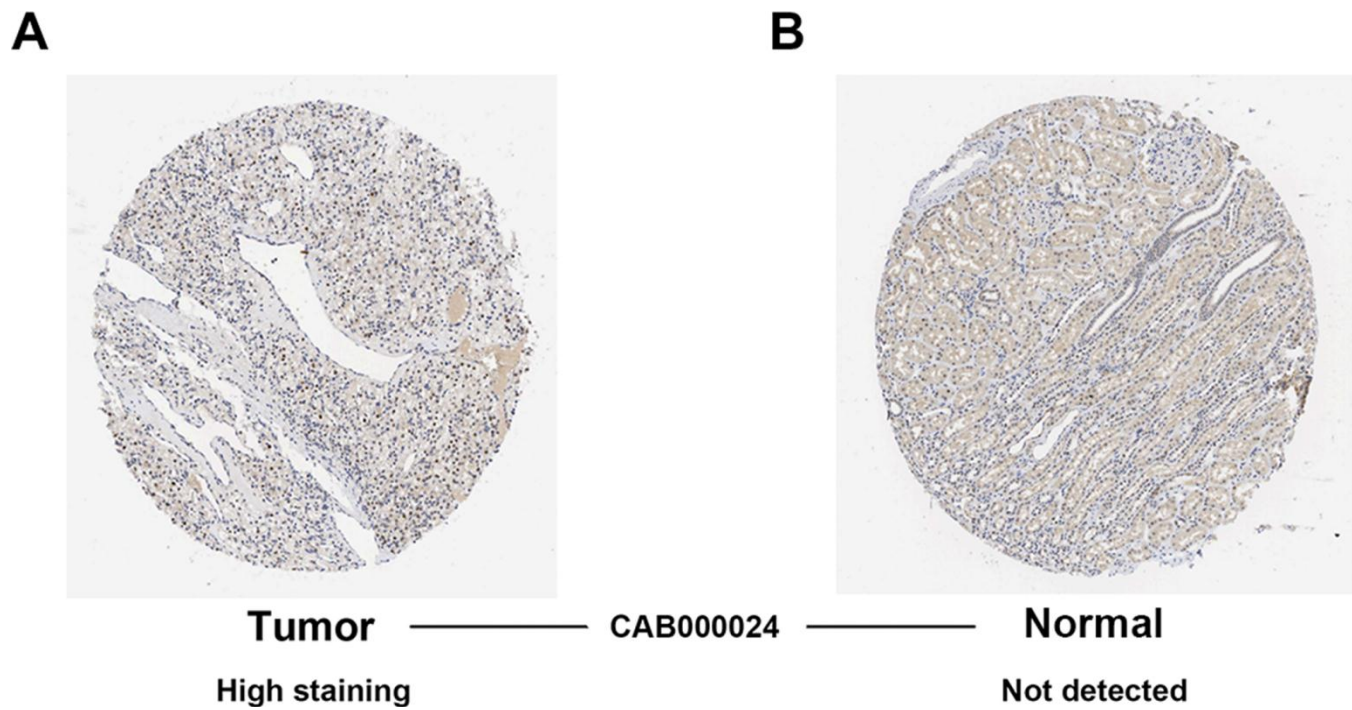

Supplementary Figure 1. *CCND1* proteins expression significantly high staining expressions were observed in ccRCC tissues.

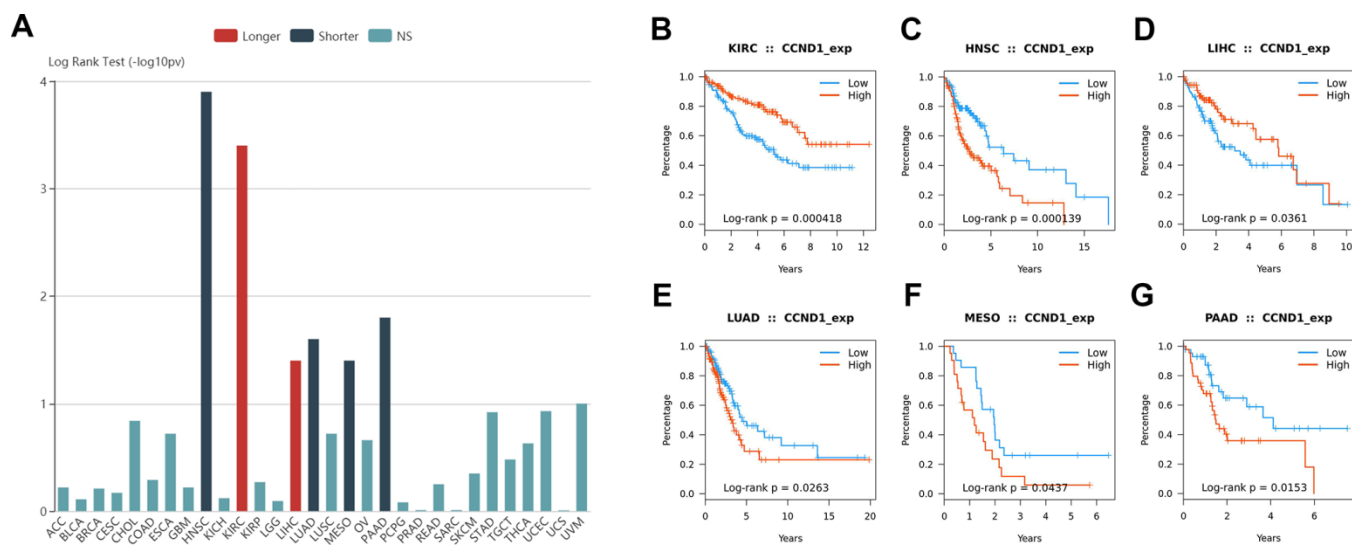

Supplementary Figure 2. (A) The expression and prognostic value of *CCND1* in tumors based on TCGA cohort. (B–G) High expression of *CCND1* is related to the better prognosis of patients with kidney renal clear cell carcinoma and liver hepatocellular carcinoma. However, high expression of *CCND1* is associated with poor prognosis of head and neck squamous cell carcinoma, lung adenocarcinoma, mesothelioma and pancreatic adenocarcinoma.

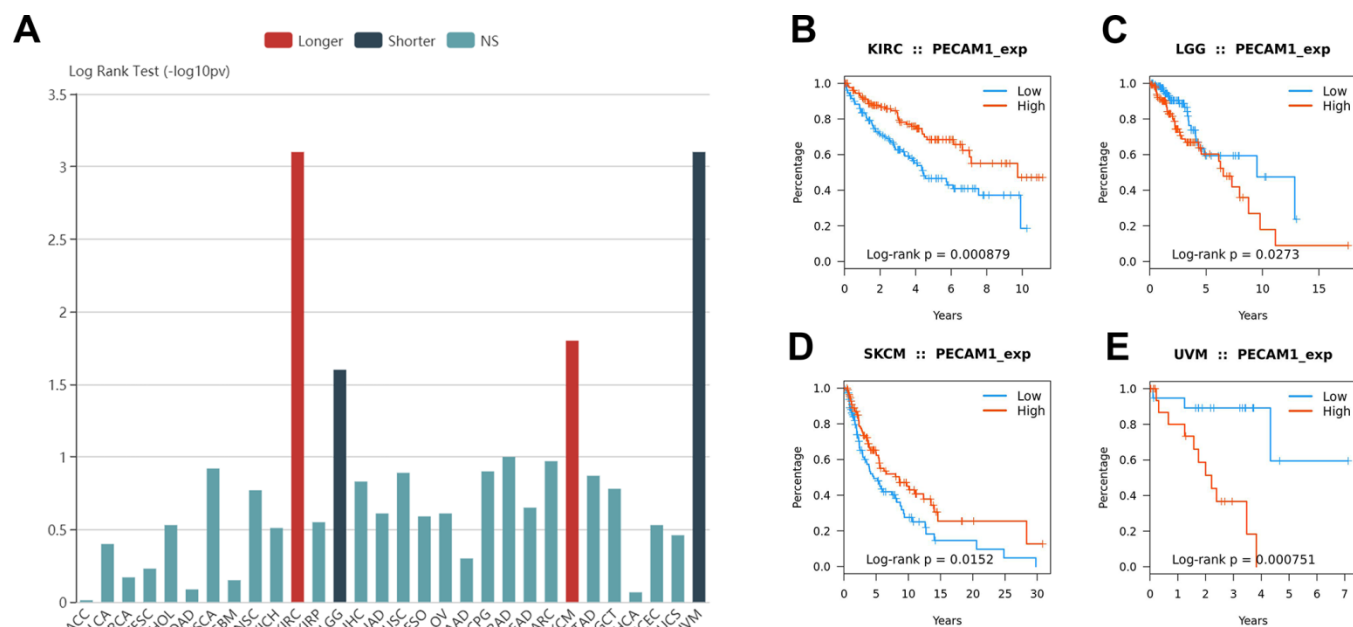

**Supplementary Figure 3.** (A) The expression and prognostic value of PECAM1/CD31 in tumors based on TCGA cohort. (B–E) The high expression of PECAM1/CD31 is related to the better prognosis of patients with kidney renal clear cell carcinoma and skin cutaneous melanoma. However, the high expression of PECAM1/CD31 is related to the poor prognosis of patients with brain low grade glioma and uveal melanoma.
